# Supplementary material for: Effect of feeding Chinese herb medicine ageratum-liquid on intestinal bacterial translocations induced by H9N2 AIV in mice
Source: Springer Nature journal article supplement (doi:10.1186/s12985-019-1131-y), 2019-02-21
Supplement: MOESM1 [file 16497964]

1 **Supplementary Material 1. *E.coli* (Neongreen-tagged bacteria) CPU in the tissue of**  
 2 **Neongreen group mice after intragastrical administration of labeled bacteria**

| Tissue           | Neongreen group |             |             |             |
|------------------|-----------------|-------------|-------------|-------------|
|                  | 12 h            | 24 h        | 36 h        | 48 h        |
| intestine cavity | 1008.3±240.2    | 691.7±364.3 | 816.7±289.8 | 258.3±137.7 |
| Lung             | 0               | 0           | 83.3±52     | 100±90.1    |
| mesentery        | 0               | 0           | 0           | 0           |
| Liver            | 0               | 0           | 0           | 0           |

3
