# Supplementary material for: Effect of feeding Chinese herb medicine ageratum-liquid on intestinal bacterial translocations induced by H9N2 AIV in mice
Source: Springer Nature journal article supplement (doi:10.1186/s12985-019-1131-y), 2019-02-21
Supplement: MOESM2 [file 16497964]

1 **Supplementary Material 2.** *E.coli* (Neongreen-tagged bacteria) CPU in the tissue of  
 2 Infection-Neongreen group mice after intragastrical administration of labeled bacteria

| Tissue           | Infection-Neongreen group |              |              |               |
|------------------|---------------------------|--------------|--------------|---------------|
|                  | 12 h                      | 24 h         | 36 h         | 48 h          |
| intestine cavity | 996.6±287.6               | 1133.3±362.6 | 1191.7±563.4 | 8658.3±5405.7 |
| Lung             | 0                         | 508.3±267.3  | 2475±1412.7  | 4916.7±2350.7 |
| mesentery        | 0                         | 0            | 833.3±274.2  | 616.7±314.6   |
| Liver            | 0                         | 0            | 0            | 41.7±72.2     |

3
