# Supplementary material for: Effect of feeding Chinese herb medicine ageratum-liquid on intestinal bacterial translocations induced by H9N2 AIV in mice
Source: Virol J. 2019 Feb 21;16:24. doi: 10.1186/s12985-019-1131-y (PMC6385471; doi:10.1186/s12985-019-1131-y)
Supplement: Supplementary file 4 — E.coli (Neongreen-tagged bacteria) CPU in the tissue of Ageratum-liquid-Neongreengroupand 1 Infection-Ageratum-liquid -Neongreen Groupmiceafter intragastrical administrationof labeled bacteria. (PDF 17 kb) [file 12985_2019_1131_MOESM4_ESM.pdf]

1 **Supplementary Material 4.** *E.coli* (Neongreen-tagged bacteria) CPU in the tissue of Ageratum-liquid-Neongreen group and  
 2 Infection-Ageratum-liquid -Neongreen Group mice after intragastrical administration of labeled bacteria  
 3

| Tissue    | Ageratum-liquid-Neongreen group |         |          |         | Infection-Ageratum-liquid -Neongreen Group |           |           |         |
|-----------|---------------------------------|---------|----------|---------|--------------------------------------------|-----------|-----------|---------|
|           | 12h                             | 24h     | 36h      | 48h     | 12h                                        | 24h       | 36h       | 48h     |
| Intestine | 1125±319.2                      | 450±477 | 108.3±52 | 66.7±52 | 791.7±623.7                                | 800±354.4 | 200±156.1 | 91.7±63 |
| Cavity    |                                 |         |          |         |                                            |           |           |         |
| Lung      | 0                               | 0       | 0        | 0       | 0                                          | 0         | 0         | 0       |
| Mesentery | 0                               | 0       | 0        | 0       | 0                                          | 0         | 0         | 0       |
| Liver     | 0                               | 0       | 0        | 0       | 0                                          | 0         | 0         | 0       |
